# Supplementary material for: Novel All Trans-Retinoic Acid Derivatives: Cytotoxicity, Inhibition of Cell Cycle Progression and Induction of Apoptosis in Human Cancer Cell Lines
Source: MDPI journal article supplement (doi:10.3390/molecules20058181), 2015-05-07
Supplement: s1 [file s1]

## Supplementary Materials

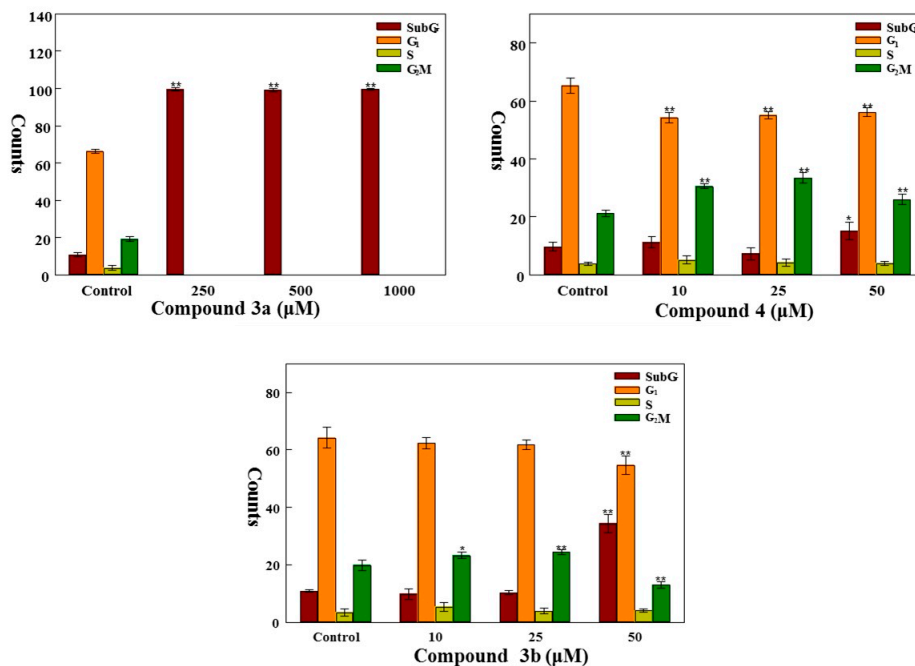

**Figure S1.** Histogram showing flow cytometry data of treated HepG<sub>2</sub> cells. The percentage of cells in each phase of the cell cycle is represented by G<sub>1</sub>, S, G<sub>2</sub>/M, and the percentage of cells that have undergone apoptosis is represented by subG<sub>1</sub>. Each histogram represents data obtained from three independent experiments. Mean  $\pm$  SD of different phases of cell cycle arrest in HepG<sub>2</sub> cells. \*  $p < 0.05$ , \*\*  $p < 0.05$  versus control.

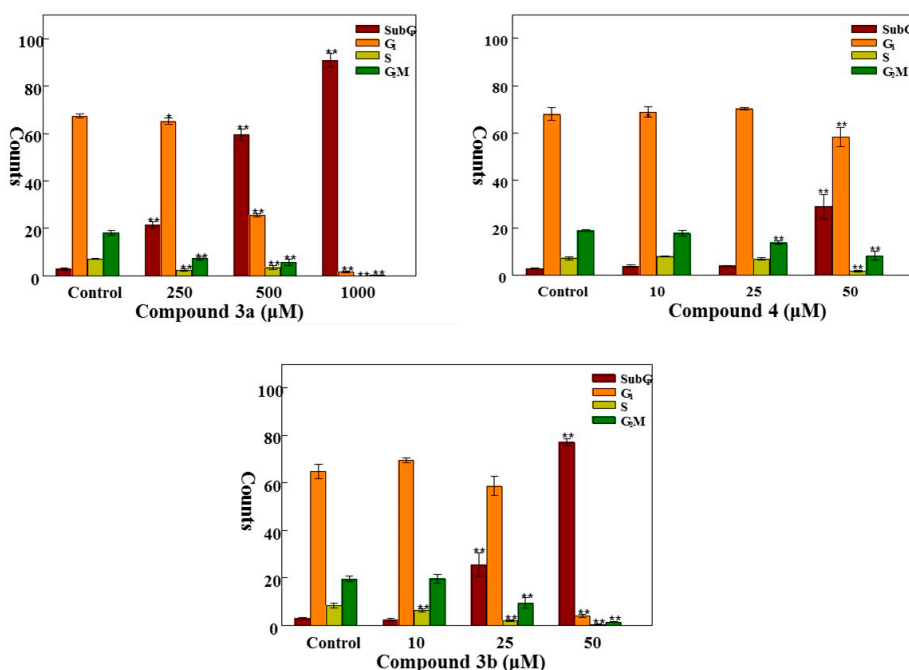

**Figure S2.** Histogram showing flow cytometry data of treated MCF-7 cells. The percentage of cells in each phase of the cell cycle is represented by G<sub>1</sub>, S, G<sub>2</sub>/M, and the percentage of cells that have undergone apoptosis is represented by subG<sub>1</sub>. Each histogram represents data obtained from three independent experiments. Mean  $\pm$  SD of different phases of cell cycle arrest in HepG<sub>2</sub> cells. \*  $p < 0.05$ , \*\*  $p < 0.05$  versus control.
